# Supplementary material
Source: Springer Nature journal article supplement (https://www.springermedizin.de/resource/supplementary/12889_2010_2450_MOESM1_ESM.pdf/9485906)
Supplement: MOESM1 [file 9485906]

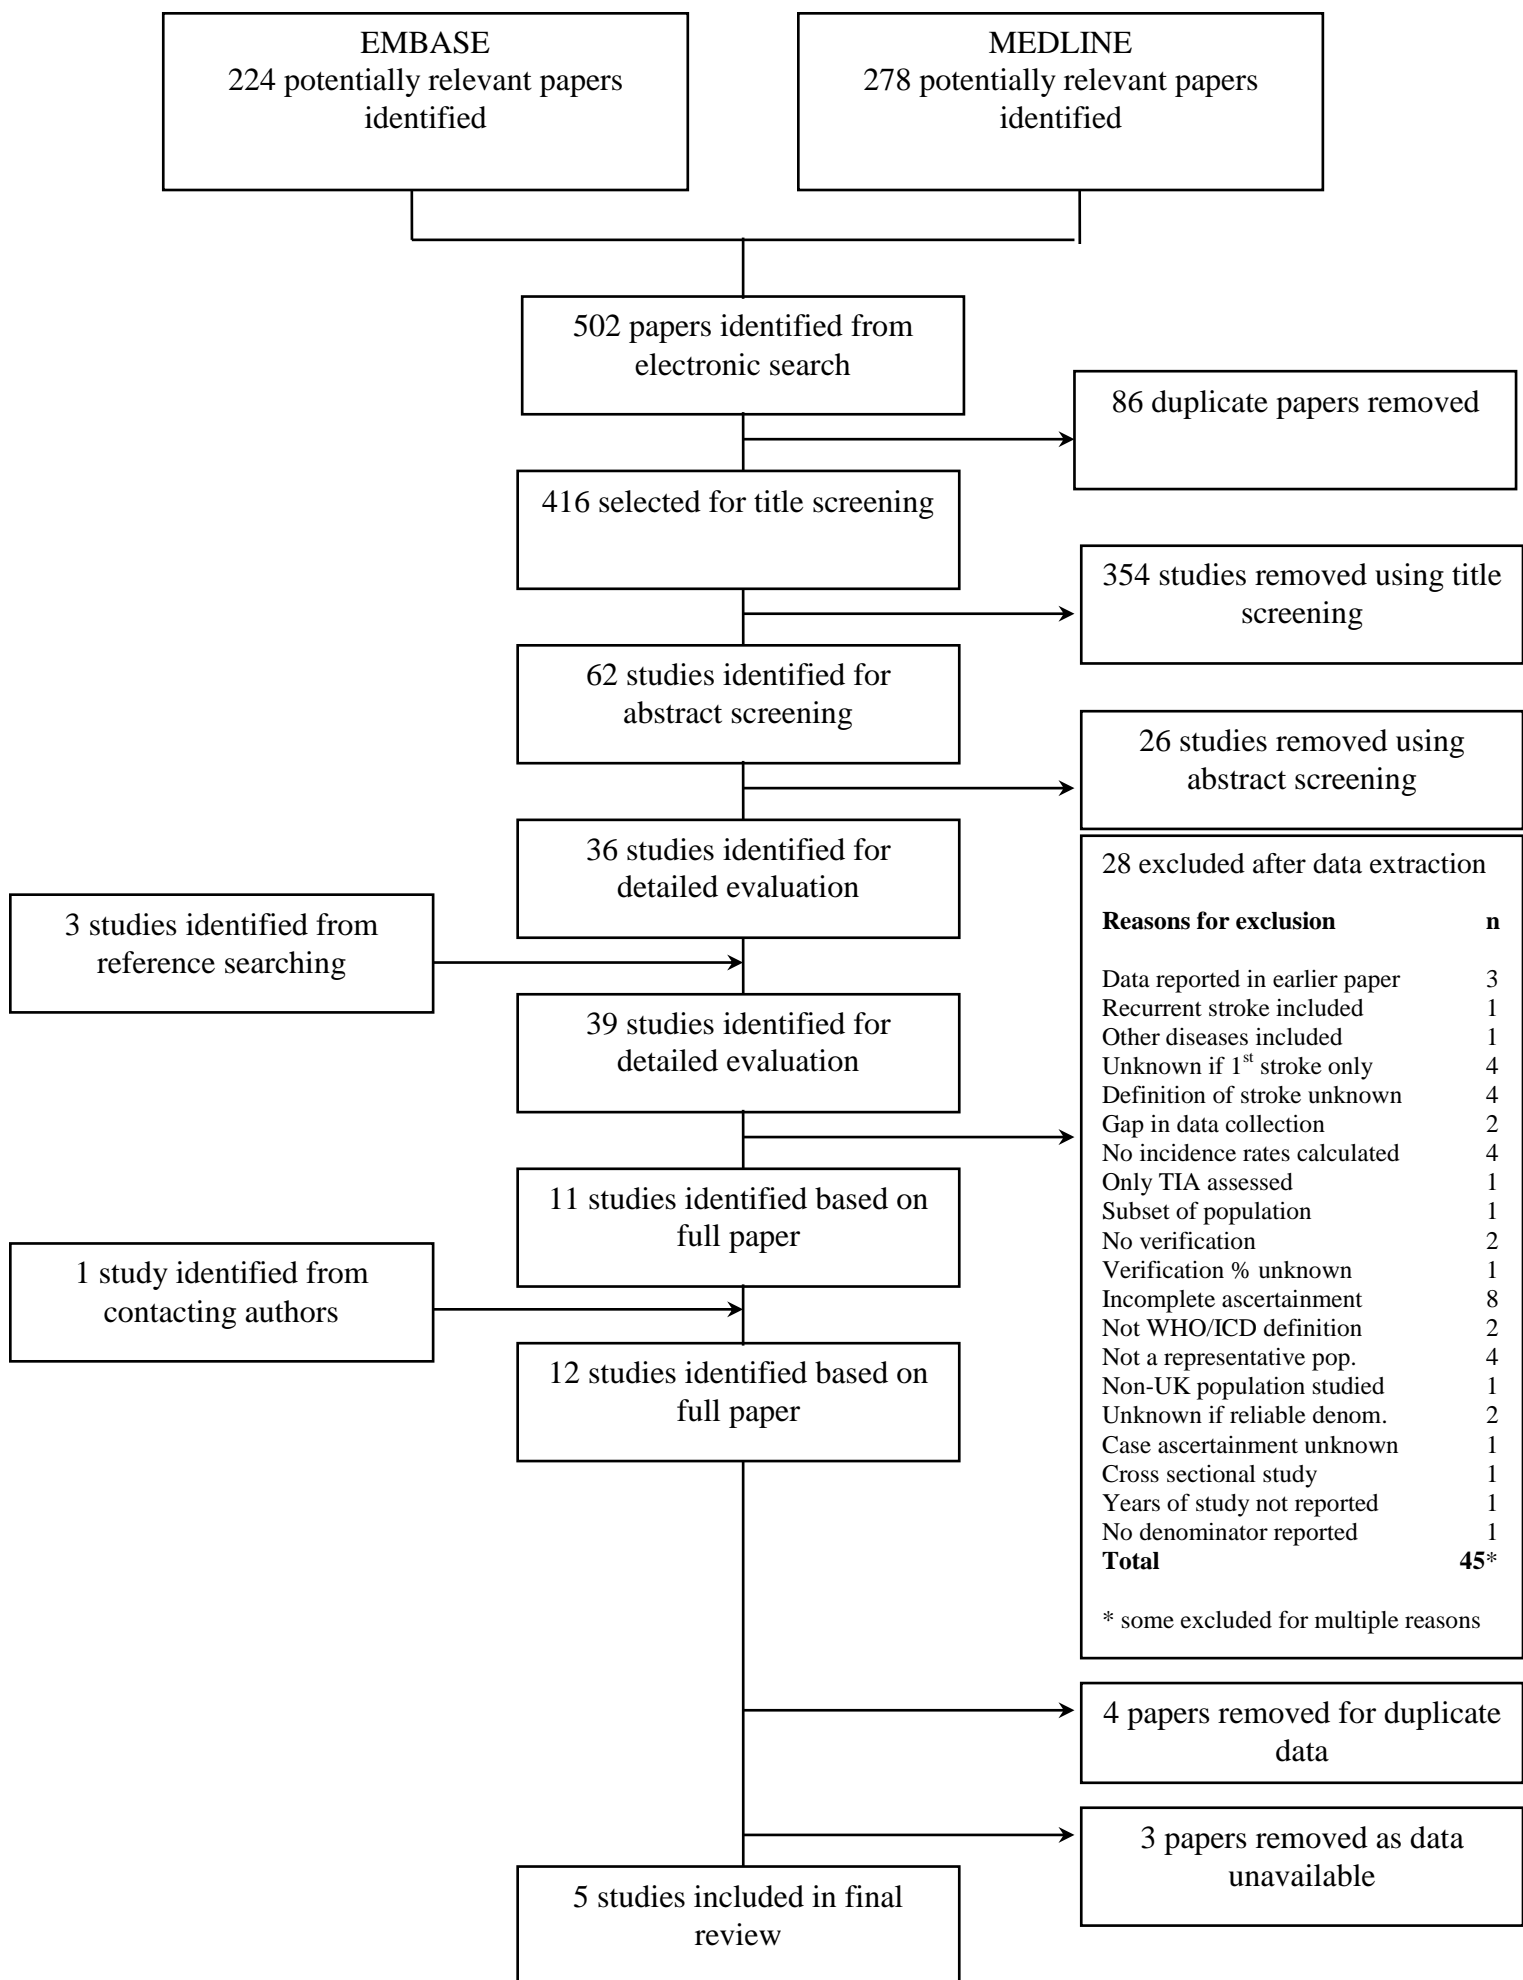

| Reasons for exclusion                  |  | n          |
|----------------------------------------|--|------------|
| Data reported in earlier paper         |  | 3          |
| Recurrent stroke included              |  | 1          |
| Other diseases included                |  | 1          |
| Unknown if 1 <sup>st</sup> stroke only |  | 4          |
| Definition of stroke unknown           |  | 4          |
| Gap in data collection                 |  | 2          |
| No incidence rates calculated          |  | 4          |
| Only TIA assessed                      |  | 1          |
| Subset of population                   |  | 1          |
| No verification                        |  | 2          |
| Verification % unknown                 |  | 1          |
| Incomplete ascertainment               |  | 8          |
| Not WHO/ICD definition                 |  | 2          |
| Not a representative pop.              |  | 4          |
| Non-UK population studied              |  | 1          |
| Unknown if reliable denom.             |  | 2          |
| Case ascertainment unknown             |  | 1          |
| Cross sectional study                  |  | 1          |
| Years of study not reported            |  | 1          |
| No denominator reported                |  | 1          |
| <b>Total</b>                           |  | <b>45*</b> |

\* some excluded for multiple reasons
